# Supplementary material for: Light-up covalent organic frameworks with flexible wall design for chemical sensing
Source: Royal Society of Chemistry journal article supplement (doi:10.1039/d4ce00635f), 2024-01-01
Supplement: d4ce00635f1.pdf [file d4ce00635f1.pdf]

## Electronic Supplementary Information

### **Light-up covalent organic frameworks via the flexible walls design for chemical sensing**

Wanyi Zhao,<sup>a</sup> Ce Xing,<sup>a</sup> Yuwei Zhang,<sup>\*a</sup> Juntao Ren<sup>\*b</sup> and He Li<sup>\*b</sup>

<sup>a</sup>Laboratory of Preparation and Applications of Environmental Friendly Materials (Jilin Normal University), Ministry of Education, Changchun, 130103, China, E-mail: yw\_zhang@jlnu.edu.cn.

<sup>b</sup>Division of Energy Materials, Dalian Institute of Chemical Physics, Chinese Academy of Sciences, Dalian 116023, China, E-mail: jtren@dicp.ac.cn; lihe@dicp.ac.cn.

## Materials

Acetic acid, tetrahydrofuran, n-butanol, o-DCB, DMF, and other chemicals were obtained from J&K Scientific company, TCI, Wako, and Sigma-Aldrich. 4,4',4''-((1,3,5-triazine-2,4,6-triyl)tris(oxy))trianiline (TTTTA), 3-hydroxy-[1,1'-biphenyl]-4,4'-dicarbaldehyde (BP-OH-1), and 3,3'-dihydroxy-[1,1'-biphenyl]-4,4'-dicarbaldehyde (BP-OH-2) were purchased from Jilin Chinese Academy of Sciences - Yanshen Technology Co., Ltd.

## Characterization

Fourier transform infrared (FT-IR) spectra were recorded on a JASCO model FT IR-6100 infrared spectrometer. X-ray diffraction (XRD) data were recorded on a Bruker D8 Focus Powder X-ray Diffractometer by using powder on glass substrate, from  $2\theta = 1.5^\circ$  up to  $30^\circ$  with  $0.02^\circ$  increment. Solid-state NMR spectra were obtained with a Bruker 500 MHz spectrometer equipped with a magic-angle spin probe using a 4 mm  $ZrO_2$  rotor. Nitrogen sorption isotherms were measured at 77 K with a TriStar II instrument (Micromeritics). The Brunauer-Emmett-Teller (BET) method was utilized to calculate the specific surface areas. By using the non-local density functional theory (NLDFT) model, the pore volume was derived from the sorption curve. The fluorescence spectra were collected at room temperature using the Hitachi F-700 spectrophotometer. EDS Elemental analysis was performed on a Euro Vector EA3000 elemental analyzer. Field-emission scanning electron microscopy (FE-SEM) images were performed on a JEOL model JSM-6700 operating at an accelerating voltage of 5.0 kV. The samples were prepared for SEM by drop-casting a tetrahydrofuran suspension onto mica substrate and then coated with gold.

**(a)**

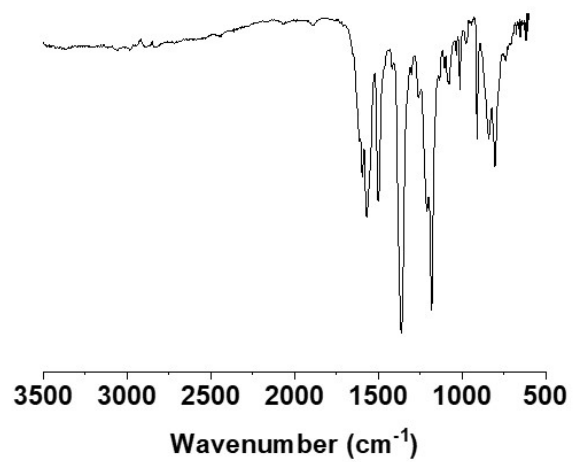

**(b)**

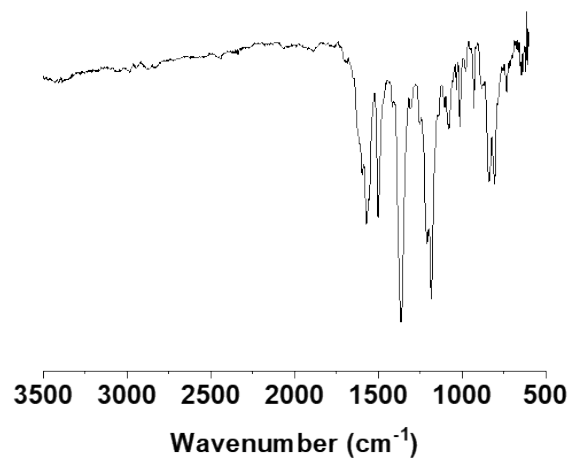

**Fig. S1** FT-IR spectra of (a) TTTT-COF-1 and (b) TTTT-COF-2.

**(a)**

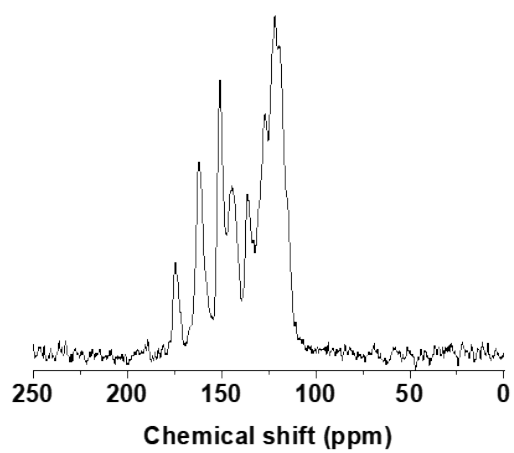

**(b)**

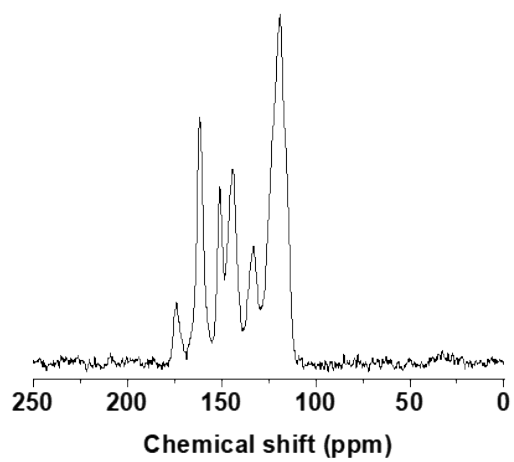

**Fig. S2** Solid  $^{13}\text{C}$  NMR spectra of (a) TTTT-COF-1 and (b) TTTT-COF-2.

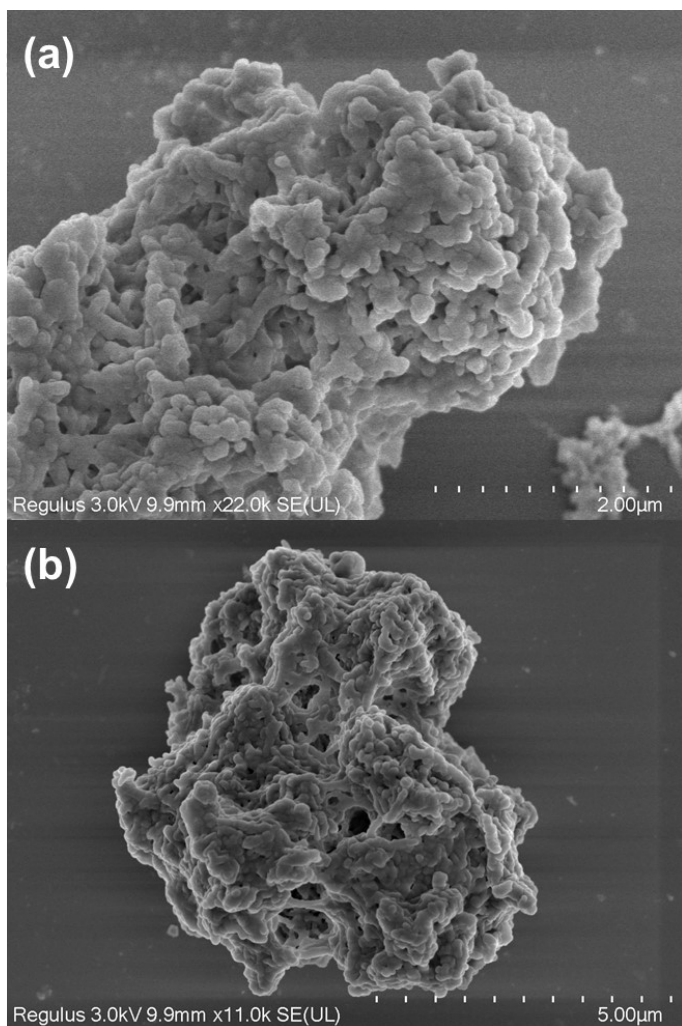

**Fig. S3** FE SEM images of (a) TTTT-COF-1 and (b) TTTT-COF-2.

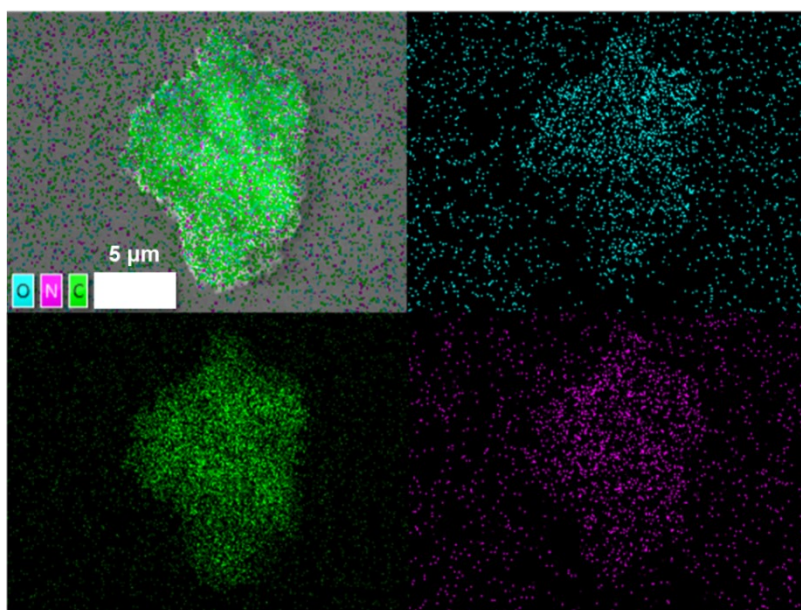

**Fig. S4** EDS mapping images of TTTT-COF-1.

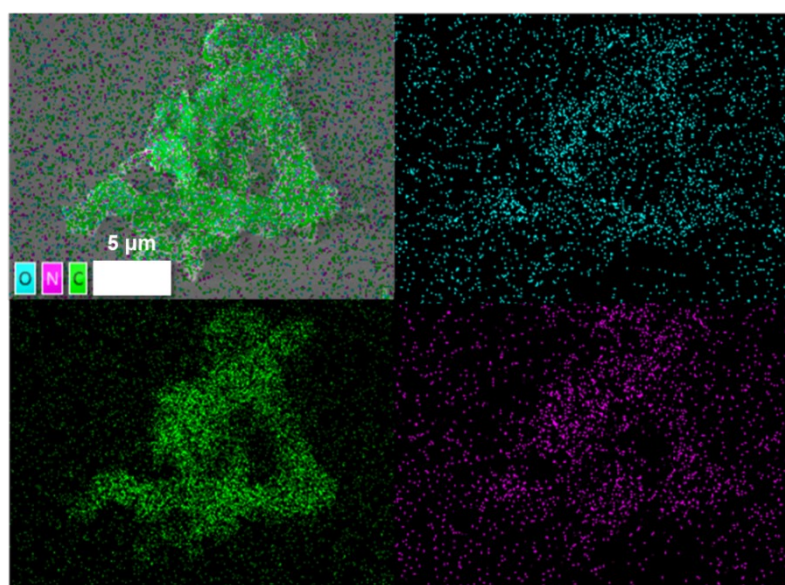

**Fig. S5** EDS mapping images of TTTT-COF-2.

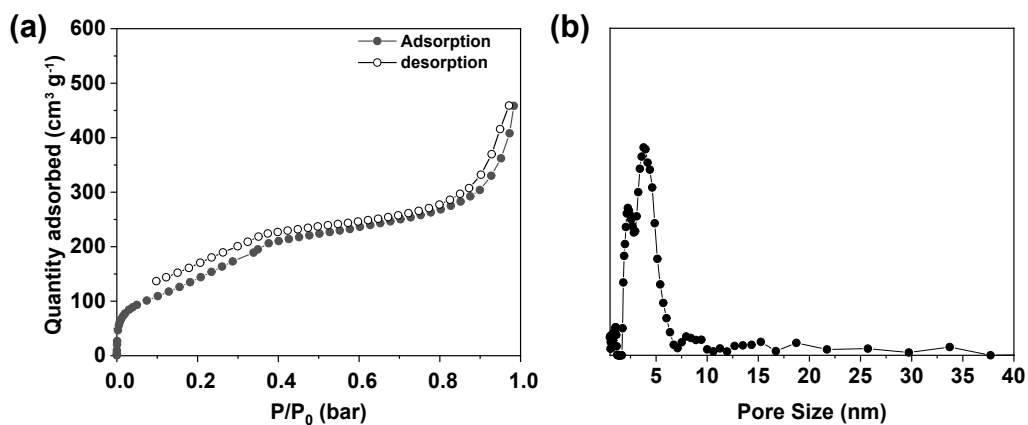

**Fig. S6** (a) Nitrogen adsorption-desorption isotherms of TTTT-COF-1 measured at 77 K. (b) Pore size distribution of TTTT-COF-1.

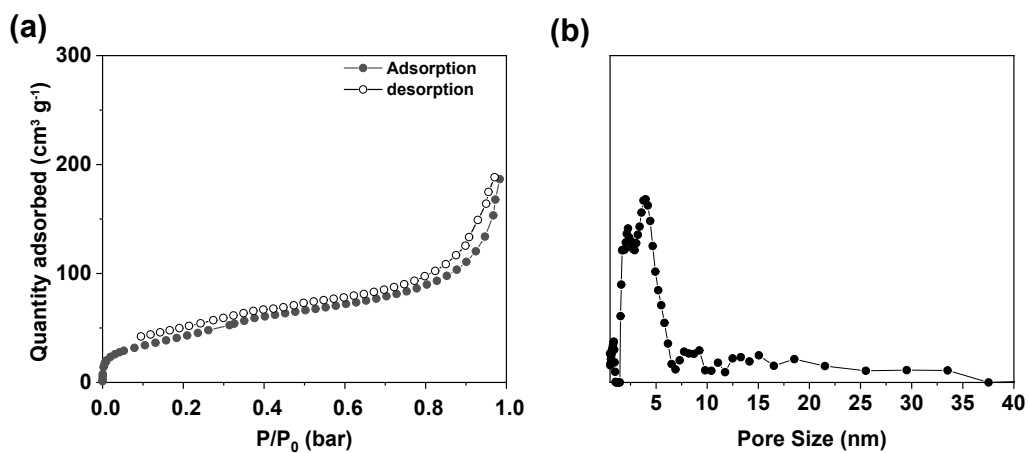

**Fig. S7** (a) Nitrogen adsorption-desorption isotherms of TTTT-COF-2 measured at 77 K. (b) Pore size distribution of TTTT-COF-2.

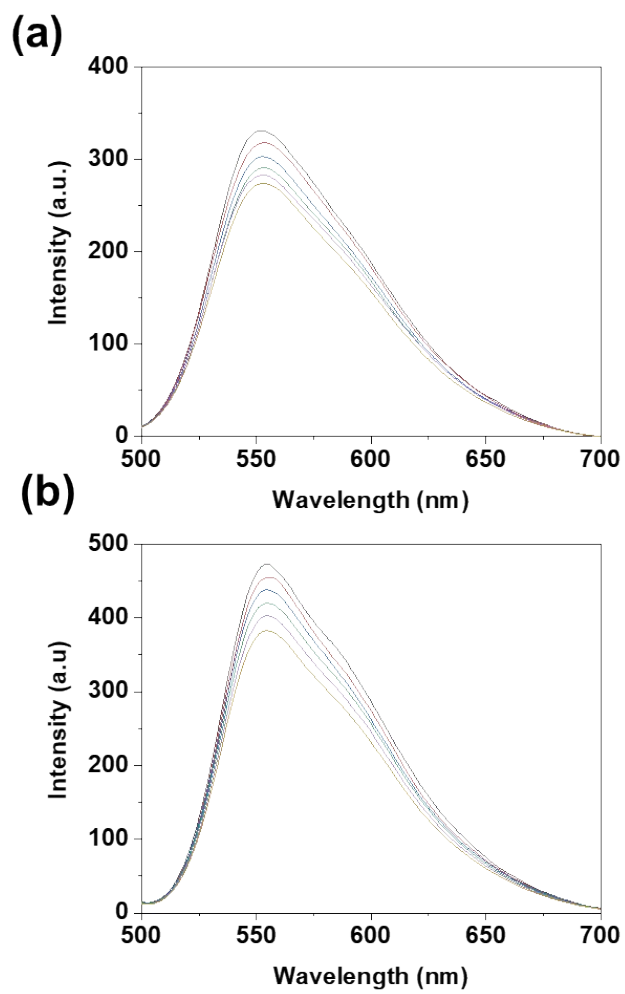

**Fig. S8** Fluorescence spectra of (a) TTTT-COF-1 and (b) TTTT-COF-2 with different DNP concentration.



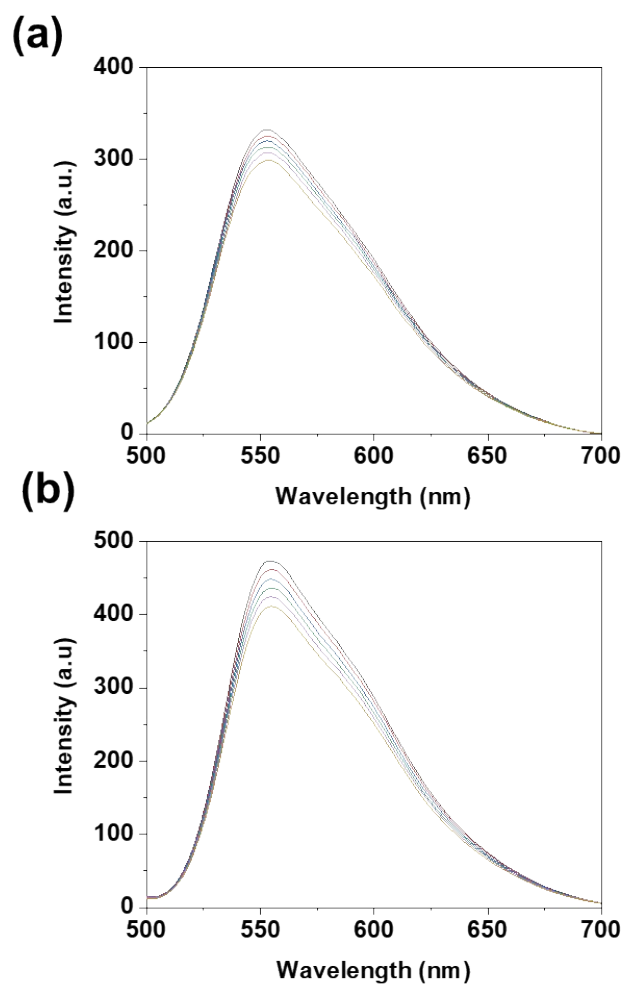

**Fig. S9** Fluorescence spectra of (a) TTTT-COF-1 and (b) TTTT-COF-2 with different DNT concentration.

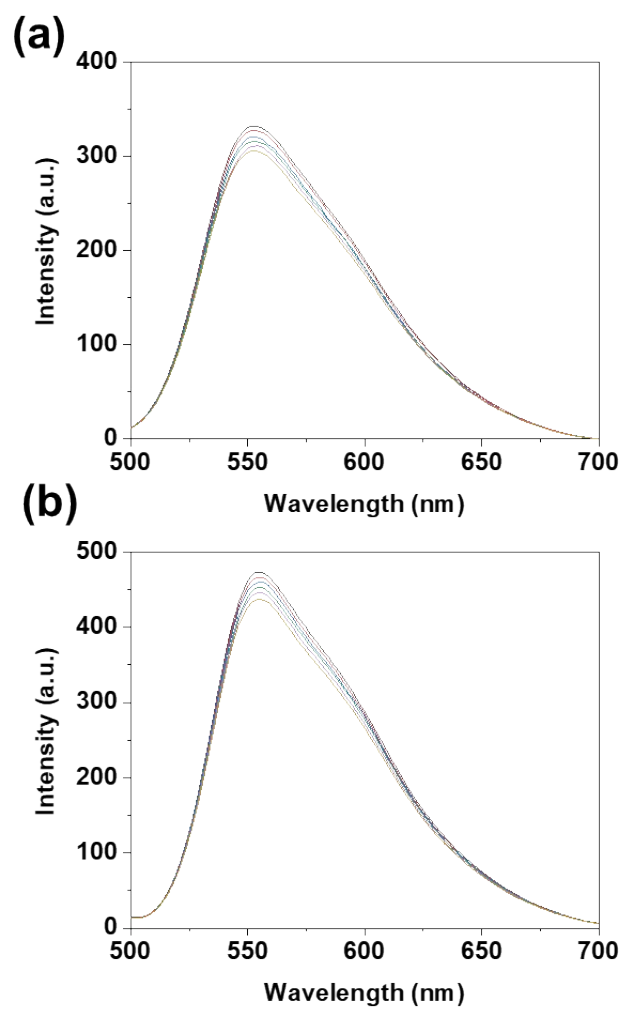

**Fig. S10** Fluorescence spectra of (a) TTTT-COF-1 and (b) TTTT-COF-2 with different NP concentration.

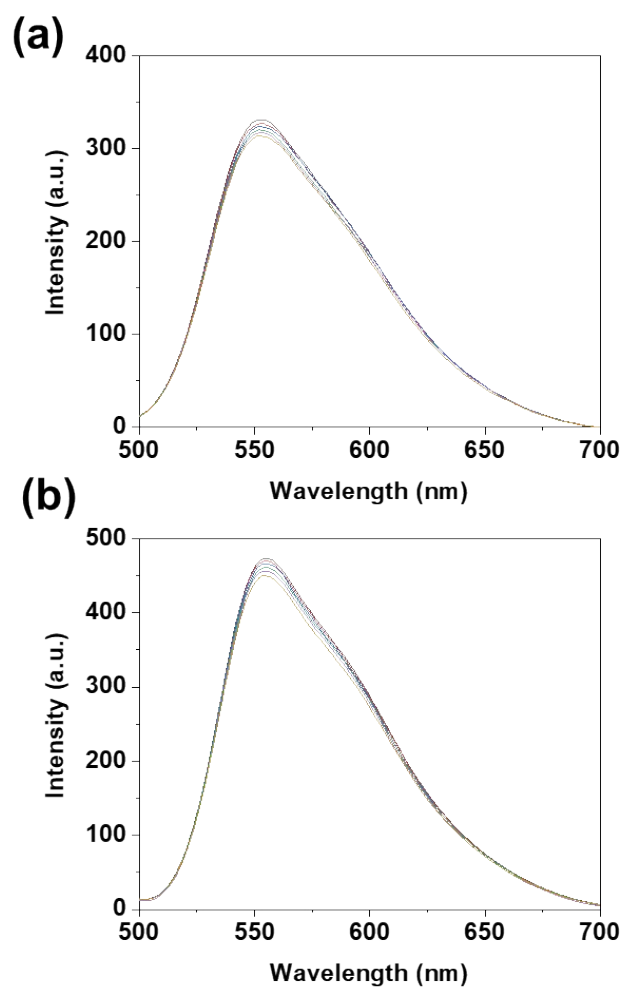

**Fig. S11** Fluorescence spectra of (a) TTTT-COF-1 and (b) TTTT-COF-2 with different NT concentration.

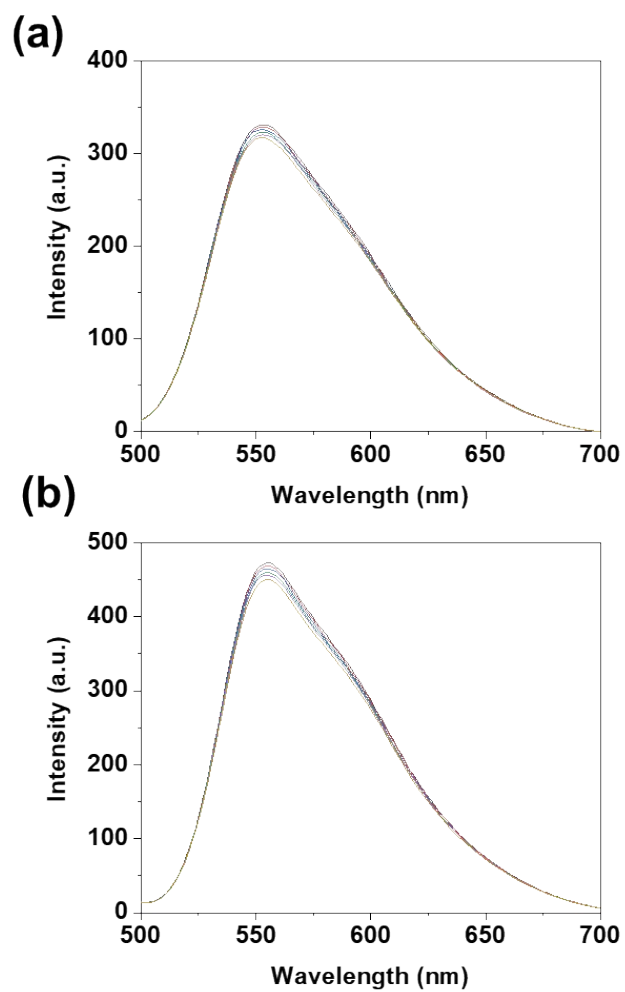

**Fig. S12** Fluorescence spectra of (a) TTTT-COF-1 and (b) TTTT-COF-2 with different NB concentration.

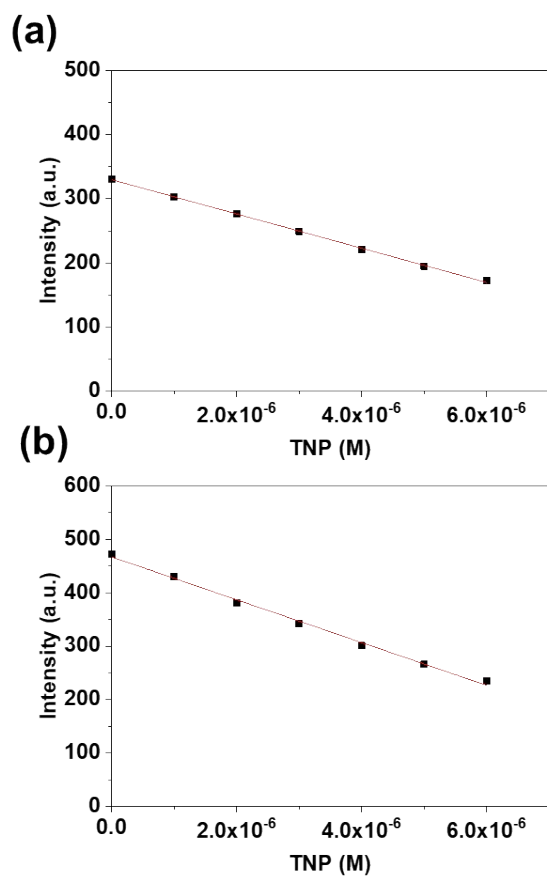

**Fig. S13** PL quenching Intensity of (a) TTTT-COF-1 and (b) TTTT-COF-2 as a function of TNP concentration.

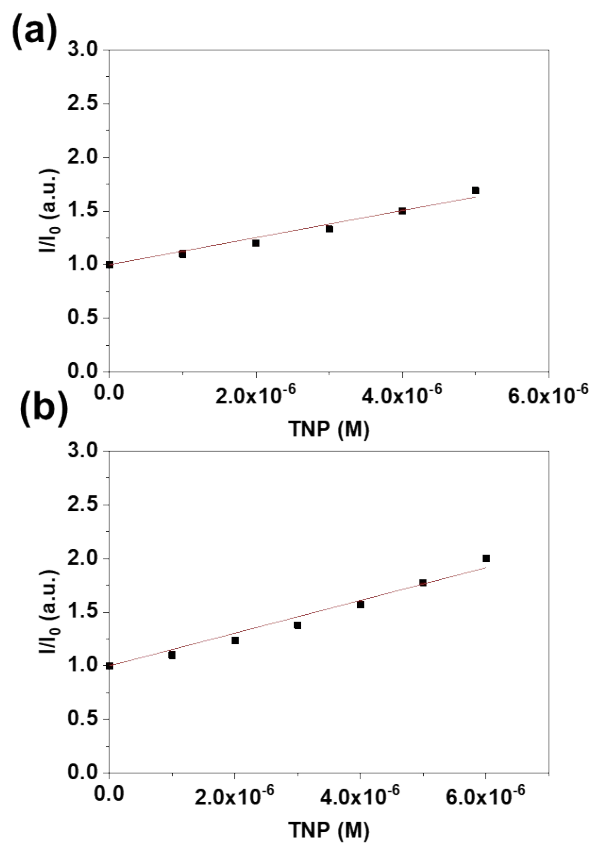

**Fig. S14** Plot of PL quenching efficiency ( $I_0/I$ ) of (a) TTTT-COF-1 and (b) TTTT-COF-2 as a function of TNP concentration.

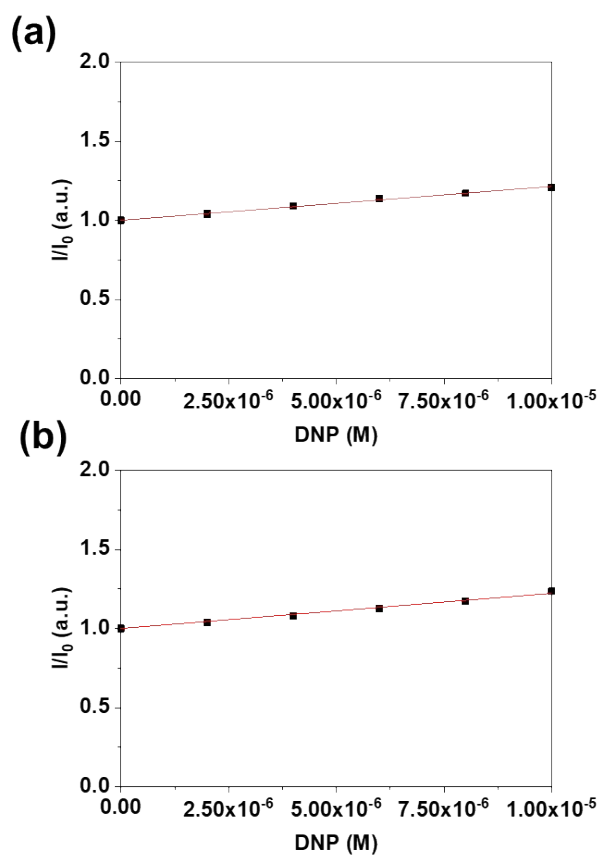

**Fig. S15** Plot of PL quenching efficiency ( $I_0/I$ ) of (a) TTTT-COF-1 and (b) TTTT-COF-2 as a function of DNP concentration.

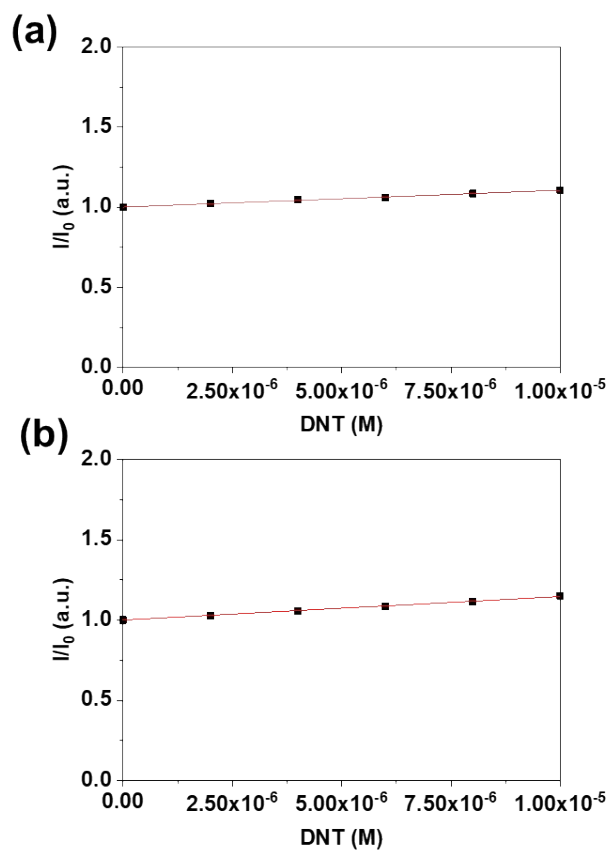

**Fig. S16** Plot of PL quenching efficiency ( $I_0/I$ ) of (a) TTTT-COF-1 and (b) TTTT-COF-2 as a function of DNT concentration.



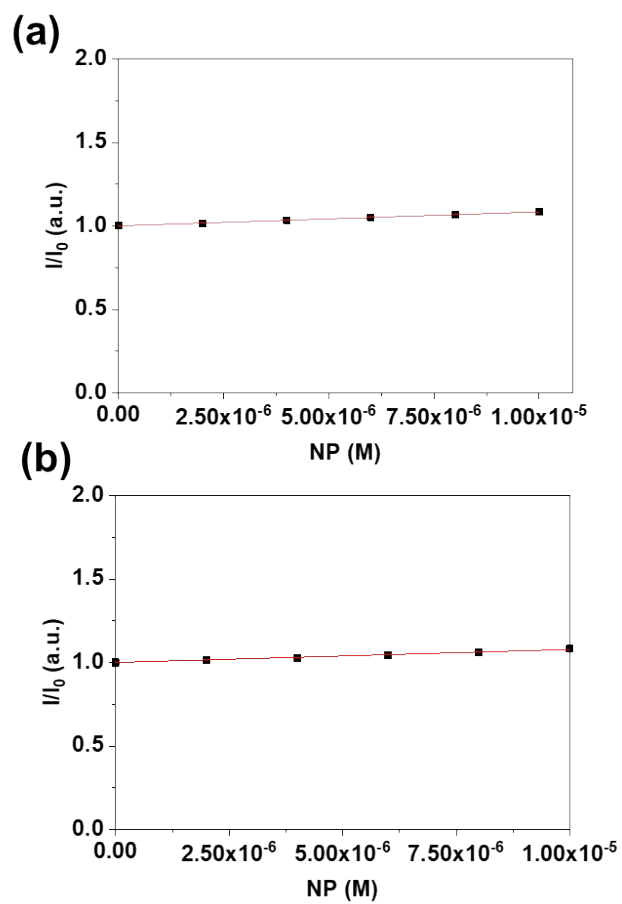

**Fig. S17** Plot of PL quenching efficiency ( $I_0/I$ ) of (a) TTTT-COF-1 and (b) TTTT-COF-2 as a function of NP concentration.

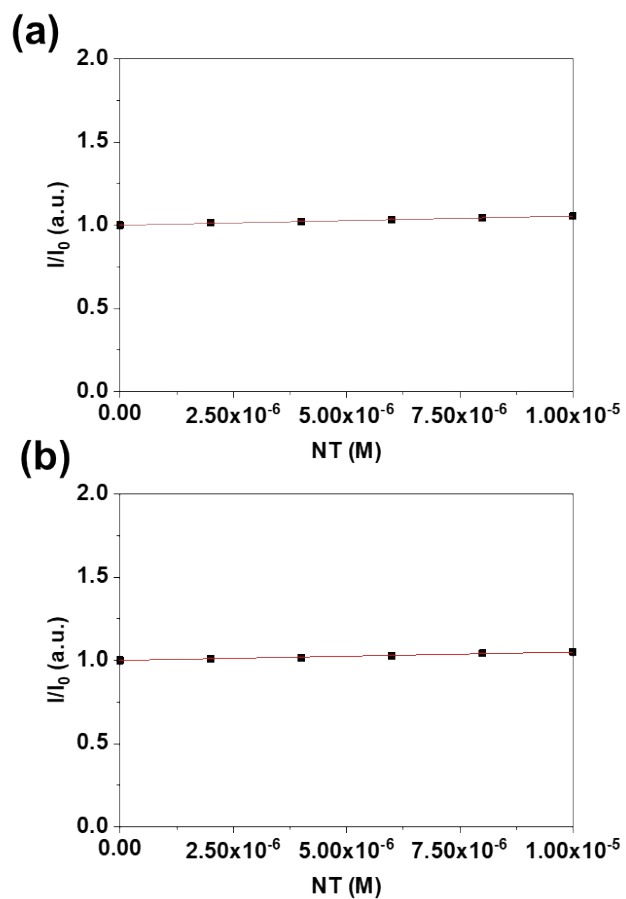

**Fig. S18** Plot of PL quenching efficiency ( $I_0/I$ ) of (a) TTTT-COF-1 and (b) TTTT-COF-2 as a function of NT concentration.

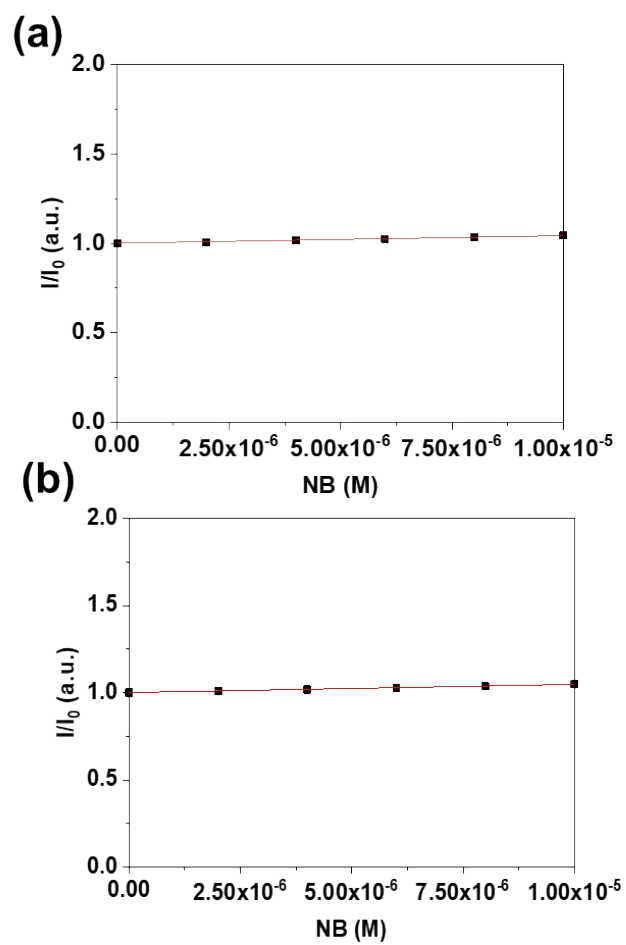

**Fig. S19** Plot of PL quenching efficiency ( $I_0/I$ ) of (a) TTTT-COF-1 and (b) TTTT-COF-2 as a function of NB concentration.
